# Supplementary material
Source: PubMed Central journal article supplement (PMC122241)

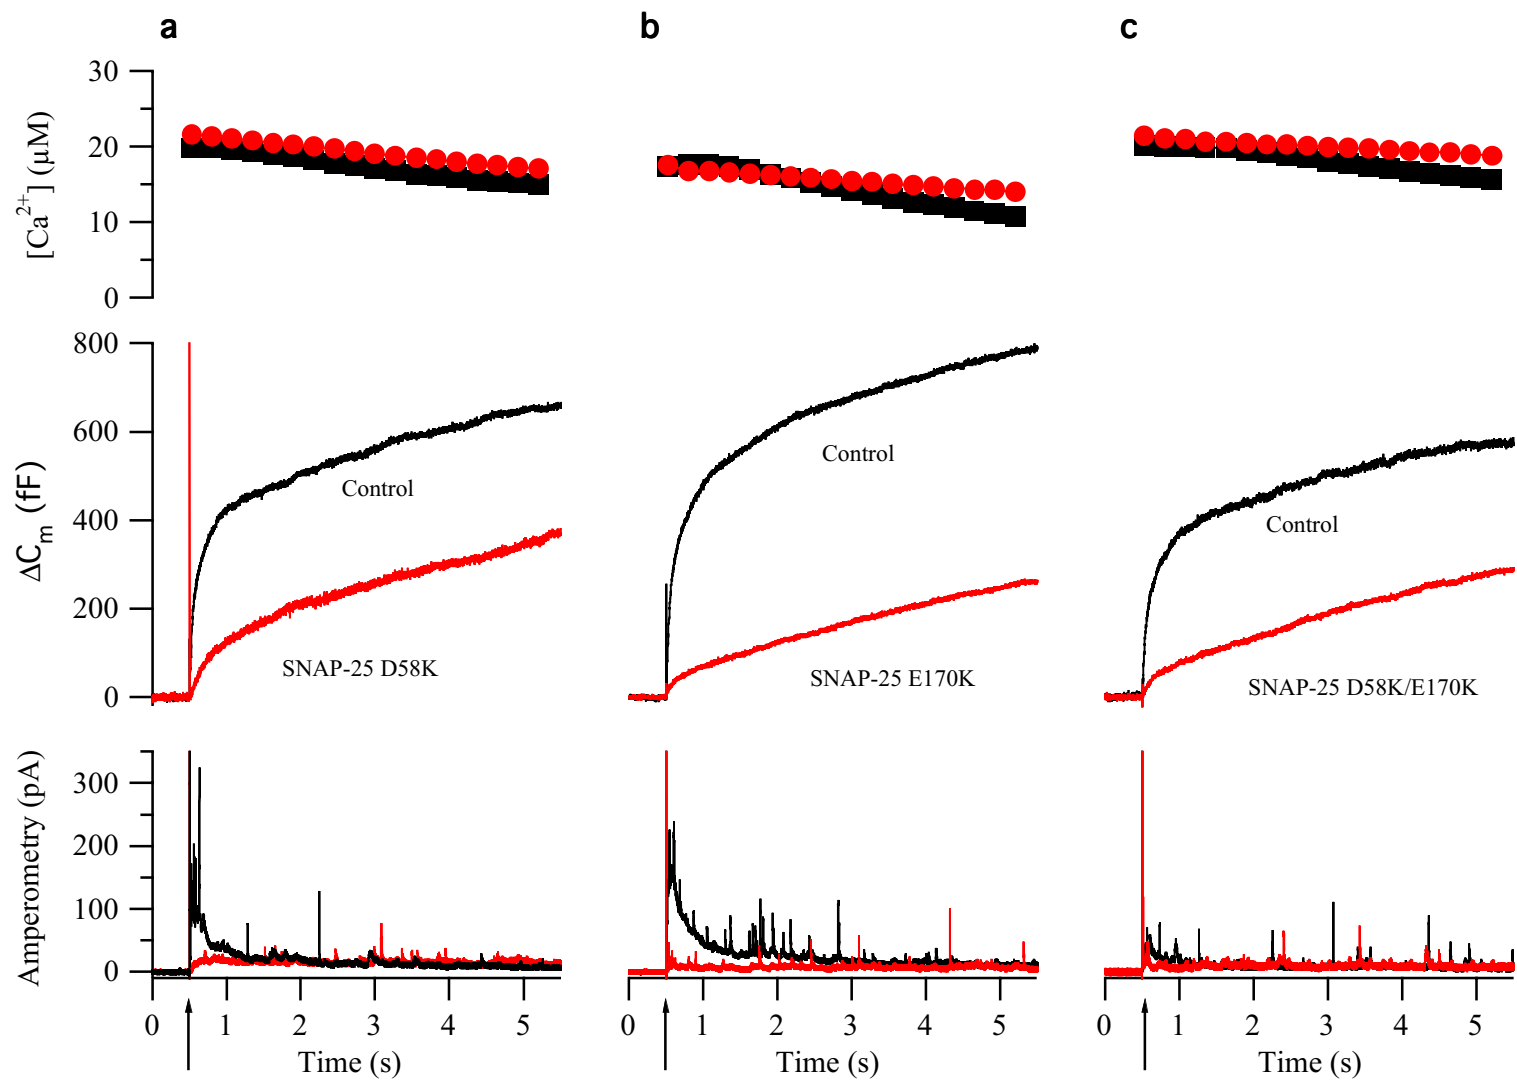

Supplement: pnas_99_3_1627__2.pdf [file pnas_99_3_1627__2.pdf]
